# Supplementary material
Source: PubMed Central journal article supplement (PMC1479229)
Supplement: iai_74_6_3633__1.pdf [file iai_74_6_3633__1.pdf]

**TABLE S1.** Genes that are transcribed at a higher level in *V. cholerae* O1 classical biotype. Differentially expressed genes were determined using SAM software using  $\geq 2.0$  fold change in gene expression and False Discovery Rate (FDR)  $\leq 0.01$  as a criteria.

| <b>Gene ID / Main Cellular Roles</b>                             |                                                                                    | <b>Fold Change</b> |
|------------------------------------------------------------------|------------------------------------------------------------------------------------|--------------------|
| <b>Amino Acid Biosynthesis</b>                                   |                                                                                    |                    |
| VC0390                                                           | 5-methyltetrahydrofolate--homocysteine methyltransferase <i>metH</i>               | 2.92               |
| VC1061                                                           | cysteine synthase/cystathionine beta-synthase family protein                       | 2.16               |
| VC1174                                                           | anthranilate synthase component I <i>trpE</i>                                      | 2.29               |
| VC2316                                                           | N-acetylglutamate synthase <i>argA</i>                                             | 2.86               |
| VC2683                                                           | cystathionine gamma-synthase <i>metB</i>                                           | 3.41               |
| VC2684                                                           | aspartokinase II/homoserine dehydrogenase_ methionine-sensitive <i>metL</i>        | 2.26               |
| VC2685                                                           | 5_10-methylenetetrahydrofolate reductase <i>metF</i>                               | 2.41               |
| <b>Biosynthesis of Cofactors, Prosthetic Groups and Carriers</b> |                                                                                    |                    |
| VC0061                                                           | thiamin biosynthesis protein ThiC <i>thiC</i>                                      | 4.82               |
| VC0064                                                           | thiS protein <i>thiS</i>                                                           | 4.37               |
| VC0065                                                           | thiG protein <i>thiG</i>                                                           | 2.36               |
| VC0638                                                           | dihydropteroate synthase <i>folP</i>                                               | 3.14               |
| VC1024                                                           | molybdenum cofactor biosynthesis protein A <i>moaA</i>                             | 3.21               |
| VC1025                                                           | molybdenum cofactor biosynthesis protein B <i>moaB</i>                             | 2.08               |
| VC1026                                                           | molybdenum cofactor biosynthesis protein C <i>moaC</i>                             | 2.51               |
| VC1027                                                           | molybdenum cofactor biosynthesis protein D <i>moaD</i>                             | 2.34               |
| VC1028                                                           | molybdenum cofactor biosynthesis protein E <i>moaE</i>                             | 2.40               |
| VC1237                                                           | nicotinate-nucleotide--dimethylbenzimidazole phosphoribosyltransferase <i>cobT</i> | 2.07               |
| VC1296                                                           | phosphomethylpyrimidine kinase <i>thiD</i>                                         | 2.23               |
| VC1526                                                           | molybdopterin-guanine dinucleotide biosynthesis protein A <i>mobA</i>              | 2.03               |
| VCA0723                                                          | 3-hydroxy-3-methylglutaryl CoA reductase <i>hmgA</i>                               | 2.81               |
| <b>Cell Envelope</b>                                             |                                                                                    |                    |
| VC0858                                                           | type IV pilin_ putative                                                            | 3.49               |
| VC2632                                                           | fimbrial assembly protein PilO_ putative                                           | 4.45               |
| VCA0144                                                          | immunogenic protein                                                                | 4.97               |
| <b>Cellular Processes: Cell Division</b>                         |                                                                                    |                    |
| VC0418                                                           | maf protein <i>maf</i>                                                             | 2.62               |
| VC1714                                                           | cell division protein MukB <i>mukB</i>                                             | 2.77               |
| VC2397                                                           | cell division protein FtsZ <i>ftsZ</i>                                             | 2.57               |
| <b>Cellular Processes: Chemotaxis and Motility</b>               |                                                                                    |                    |
| VC1130                                                           | DNA-binding protein VicH <i>vicH</i>                                               | 4.63               |
| VC1289                                                           | methyl-accepting chemotaxis protein                                                | 2.58               |
| VC1313                                                           | methyl-accepting chemotaxis protein                                                | 2.14               |
| VC2601                                                           | sodium-type flagellar protein MotX <i>motX</i>                                     | 2.06               |
| VCA0068                                                          | methyl-accepting chemotaxis protein                                                | 2.71               |
| <b>Cellular Processes: Pathogenesis</b>                          |                                                                                    |                    |
| VC0820                                                           | ToxR-activated gene A protein <i>tagA</i>                                          | 2.00               |
| VC0825                                                           | toxin co-regulated pilus biosynthesis protein I <i>tcpI</i>                        | 8.64               |
| VC0826                                                           | toxin co-regulated pilus biosynthesis protein P <i>tcpP</i>                        | 3.84               |
| VC0827                                                           | toxin co-regulated pilus biosynthesis protein H <i>tcpH</i>                        | 3.95               |
| VC0830                                                           | toxin co-regulated pilus biosynthesis protein Q <i>tcpQ</i>                        | 19.85              |
| VC0831                                                           | toxin co-regulated pilus biosynthesis outer membrane protein C <i>tcpC</i>         | 8.02               |

|         |                                                             |       |
|---------|-------------------------------------------------------------|-------|
| VC0832  | toxin co-regulated pilus biosynthesis protein R <i>tcpR</i> | 19.36 |
| VC0833  | toxin co-regulated pilus biosynthesis protein D <i>tcpD</i> | 33.89 |
| VC0834  | toxin co-regulated pilus biosynthesis protein S <i>tcpS</i> | 25.03 |
| VC0835  | toxin co-regulated pilus biosynthesis protein T <i>tcpT</i> | 15.87 |
| VC0836  | toxin co-regulated pilus biosynthesis protein E <i>tcpE</i> | 8.90  |
| VC0837  | toxin co-regulated pilus biosynthesis protein F <i>tcpF</i> | 7.68  |
| VC0838  | TCP pilus virulence regulatory protein <i>tcpN/toxT</i>     | 7.29  |
| VC0839  | leader peptidase TcpJ <i>tcpJ</i>                           | 4.81  |
| VC0840  | accessory colonization factor AcfB <i>acfB</i>              | 4.95  |
| VC0841  | accessory colonization factor AcfC <i>acfC</i>              | 4.09  |
| VC0843  | tagE protein <i>tagE-1</i>                                  | 3.59  |
| VC0844  | accessory colonization factor AcfA <i>acfA</i>              | 9.08  |
| VC1456  | cholera enterotoxin_ B subunit <i>ctxB</i>                  | 3.59  |
| VC1457  | cholera enterotoxin_ A subunit <i>ctxA</i>                  | 3.69  |
| VCA0218 | thermolabile hemolysin                                      | 3.61  |
| VCA0646 | conserved hypothetical protein/hemolysin_ putative          | 2.16  |

---

### Cellular Processes: Other

|        |              |      |
|--------|--------------|------|
| VC2145 | tyrA protein | 2.93 |
|--------|--------------|------|

---

### Central Intermediary Metabolism

|         |                                                                           |      |
|---------|---------------------------------------------------------------------------|------|
| VC0606  | nitrogen regulatory protein P-II <i>glnB-1</i>                            | 4.21 |
| VC1623  | carboxynorspermidine decarboxylase <i>nspC</i>                            | 4.68 |
| VC1625  | aminotransferase_ class III/decarboxylase_ group II_ authentic frameshift | 4.68 |
| VC1945  | FAD monooxygenase_ PheA/TfdB family                                       | 2.36 |
| VCA0102 | CbbY family protein                                                       | 2.10 |
| VCA0402 | acetyltransferase_ putative                                               | 2.18 |
| VCA0496 | glutathione S-transferase_ putative                                       | 2.05 |
| VCA0605 | aminotransferase_ class III                                               | 2.83 |

---

### DNA Metabolism

|         |                                                           |      |
|---------|-----------------------------------------------------------|------|
| VC0345  | DNA mismatch repair protein MutL <i>mutL</i>              | 2.30 |
| VC0371  | replicative DNA helicase <i>dnaB</i>                      | 2.07 |
| VC0397  | single-strand binding protein <i>ssb</i>                  | 2.33 |
| VC1846  | Holliday junction DNA helicase RuvA <i>ruvA</i>           | 2.35 |
| VC1847  | crossover junction endodeoxyribonuclease RuvC <i>ruvC</i> | 2.25 |
| VC2015  | DNA polymerase III_ delta prime subunit <i>holB</i>       | 2.06 |
| VC2245  | DNA polymerase III_ alpha subunit <i>dnaE</i>             | 2.43 |
| VCA0198 | site-specific DNA-methyltransferase_ putative             | 3.17 |

---

### Energy Metabolism

|        |                                                         |      |
|--------|---------------------------------------------------------|------|
| VC0786 | D-amino acid dehydrogenase_ small subunit <i>dada</i>   | 4.21 |
| VC0804 | ferredoxin                                              | 2.53 |
| VC0819 | aldehyde dehydrogenase <i>aldA-1</i>                    | 4.57 |
| VC1073 | chitinase_ putative                                     | 2.01 |
| VC1097 | phosphate acetyltransferase <i>pta</i>                  | 2.09 |
| VC1300 | L-serine dehydratase 1 <i>sdaA-1</i>                    | 2.36 |
| VC1512 | formate dehydrogenase_ iron-sulfur subunit <i>fdhB</i>  | 2.55 |
| VC1616 | glutaredoxin_ putative                                  | 3.75 |
| VC1693 | cytochrome c-type protein TorC <i>torC</i>              | 2.19 |
| VC1844 | cytochrome d ubiquinol oxidase_ subunit I <i>cydA-1</i> | 2.07 |
| VC1890 | NADH dehydrogenase <i>ndh</i>                           | 2.19 |
| VC1952 | chitinase <i>chiA-1</i>                                 | 5.24 |
| VC2603 | asparaginase_ putative                                  | 2.02 |

|         |                                                |      |
|---------|------------------------------------------------|------|
| VC2698  | aspartate ammonia-lyase <i>aspA</i>            | 3.57 |
| VCA0007 | 3-hydroxyisobutyrate dehydrogenase_ putative   | 2.08 |
| VCA0161 | tryptophanase <i>tnaA</i>                      | 5.74 |
| VCA0241 | hexulose-6-phosphate isomerase SgbU_ putative  | 2.91 |
| VCA0242 | hexulose-6-phosphate synthase SgbH_ putative   | 2.01 |
| VCA0655 | sucrose-6-phosphate dehydrogenase <i>cscA</i>  | 2.25 |
| VCA0811 | chitinase_ putative                            | 9.17 |
| VCA0896 | glucose-6-phosphate 1-dehydrogenase <i>zwf</i> | 2.37 |
| VCA0897 | devB protein <i>devB</i>                       | 2.29 |

---

#### **Fatty Acid and Phospholipid Metabolism**

|        |                                                                      |      |
|--------|----------------------------------------------------------------------|------|
| VC0745 | inositol monophosphate family protein                                | 2.06 |
| VC2022 | malonyl CoA-acyl carrier protein transacylase <i>fabD</i>            | 2.46 |
| VC2023 | 3-oxoacyl-(acyl-carrier-protein) synthase III <i>fabH-1</i>          | 3.66 |
| VC2024 | fatty acid/phospholipid synthesis protein PlsX <i>plsX</i>           | 3.06 |
| VC2249 | (3R)-hydroxymyristoyl-(acyl-carrier-protein) dehydratase <i>fabZ</i> | 2.17 |

---

#### **Mobile and Extrachromosomal Element Functions**

|         |                                |      |
|---------|--------------------------------|------|
| VC0846  | integrase_ degenerate          | 2.35 |
| VC0870  | IS1004 transposase <i>tnpA</i> | 2.54 |
| VCA0493 | IS1004 transposase <i>tnpA</i> | 2.06 |

---

#### **Protein Fate**

|         |                                                 |      |
|---------|-------------------------------------------------|------|
| VC0018  | 16 kDa heat shock protein A <i>ibpA</i>         | 2.01 |
| VC0958  | apolipoprotein N-acyltransferase <i>cutE</i>    | 2.50 |
| VC2674  | protease HslVU_ ATPase subunit HslU <i>hslU</i> | 2.03 |
| VCA0533 | tatA protein <i>tatA-2</i>                      | 3.23 |
| VCA0820 | chaperonin_ 60 Kd subunit <i>groEL-2</i>        | 3.45 |

---

#### **Protein Synthesis**

|         |                                                                |      |
|---------|----------------------------------------------------------------|------|
| VC0645  | tRNA pseudouridine 55 synthase <i>truB</i>                     | 4.96 |
| VC0709  | ribosomal large subunit pseudouridine synthase D <i>rluD</i>   | 2.46 |
| VC1668  | pseudouridine synthase Rlu family protein                      | 2.51 |
| VC2281  | ribosomal protein S6 modification protein <i>rimK</i>          | 2.05 |
| VCA0104 | ribosomal large subunit pseudouridine synthase A <i>rluA-2</i> | 3.15 |
| VCA0289 | ribosomal protein L35 <i>rplI</i>                              | 2.67 |
| VCA0627 | rRNA methylase_ putative                                       | 2.21 |

---

#### **Purine, Pyrimidines, Nucleosides, Nucleotides**

|        |                                                                                          |      |
|--------|------------------------------------------------------------------------------------------|------|
| VC0276 | phosphoribosylaminoimidazolecarboxamide formyltransferase/IMP cyclohydrolase <i>purH</i> | 2.00 |
| VC0767 | inosine-5-monophosphate dehydrogenase <i>guaB</i>                                        | 2.02 |
| VC1004 | amidophosphoribosyltransferase <i>purF</i>                                               | 2.12 |
| VC1491 | dihydroorotate dehydrogenase <i>pyrD</i>                                                 | 2.22 |
| VC2389 | carbamoyl-phosphate synthase_ large subunit <i>carB</i>                                  | 2.32 |
| VC2510 | aspartate carbamoyltransferase_ catalytic subunit <i>pyrB</i>                            | 2.33 |
| VC2511 | aspartate carbamoyltransferase_ regulatory subunit <i>pyrI</i>                           | 2.19 |

---

#### **Regulatory Functions**

|        |                                                     |      |
|--------|-----------------------------------------------------|------|
| VC0072 | sensory box/GGDEF family protein                    | 2.50 |
| VC0278 | transcriptional activator CadC_ putative            | 2.15 |
| VC0290 | factor-for-inversion stimulation protein <i>fis</i> | 2.90 |
| VC1222 | integration host factor_ alpha subunit <i>himA</i>  | 2.87 |
| VC1286 | transcriptional regulator_ LacI family              | 2.34 |
| VC1651 | response regulator VieB <i>vieB</i>                 | 6.70 |
| VC1652 | response regulator VieA <i>vieA</i>                 | 4.95 |

|         |                                                                         |      |
|---------|-------------------------------------------------------------------------|------|
| VC1653  | sensory box sensor histidine kinase/response regulator VieS <i>vieS</i> | 5.45 |
| VC1713  | transcriptional regulator_ AsnC family                                  | 2.40 |
| VC2485  | transcriptional regulator_ LysR family                                  | 2.01 |
| VC2749  | nitrogen regulation protein NR(I) <i>ntrC</i>                           | 3.62 |
| VCA0532 | DNA-binding response regulator                                          | 2.04 |
| VCA0850 | response regulator                                                      | 2.17 |
| VCA0952 | transcriptional regulator_ LuxR family, <i>vpsT</i>                     | 3.23 |

---

### Transcription

|         |                                                       |      |
|---------|-------------------------------------------------------|------|
| VC0328  | DNA-directed RNA polymerase_ beta subunit <i>rpoB</i> | 2.46 |
| VC0329  | DNA-directed RNA polymerase_ beta subunit <i>rpoC</i> | 2.32 |
| VC0644  | ribosome-binding factor A <i>rbfA</i>                 | 4.46 |
| VCA0061 | ATP-dependent RNA helicase_ DEAD box family           | 3.70 |

---

### Transport and Binding Proteins

|         |                                                             |      |
|---------|-------------------------------------------------------------|------|
| VC0008  | amino acid ABC transporter_ ATP-binding protein             | 3.08 |
| VC0156  | vitamin B12 receptor <i>btuB</i>                            | 7.49 |
| VC0201  | iron(III) ABC transporter_ ATP-binding protein              | 2.71 |
| VC0481  | LysE/YggA family protein                                    | 3.03 |
| VC0906  | ABC transporter_ permease protein                           | 2.73 |
| VC0907  | ABC transporter_ ATP-binding protein                        | 2.01 |
| VC0972  | porin_ putative                                             | 2.83 |
| VC1042  | long-chain fatty acid transport protein <i>fadL-1</i>       | 2.81 |
| VC1655  | magnesium transporter <i>mgtE-1</i>                         | 5.42 |
| VC1824  | PTS system_ nitrogen regulatory IIA component_ putative     | 2.05 |
| VC1826  | PTS system_ fructose-specific IIABC component <i>fruA-1</i> | 2.13 |
| VC1929  | C4-dicarboxylate-binding periplasmic protein <i>dctP-2</i>  | 4.33 |
| VC2283  | sodium-dependent transporter                                | 2.38 |
| VC2531  | PTS system_ nitrogen regulatory IIA component <i>ptsN</i>   | 2.32 |
| VCA0036 | sodium/dicarboxylate symporter                              | 4.74 |
| VCA0193 | Na <sup>+</sup> /H <sup>+</sup> antiporter_ putative        | 3.91 |
| VCA0214 | multidrug resistance protein D <i>emrD-2</i>                | 6.69 |
| VCA0454 | sulfate-binding protein_ authentic frameshift               | 4.28 |
| VCA0943 | maltose ABC transporter_ permease protein <i>malG</i>       | 2.35 |

---

### Unkown Function

|         |                                              |      |
|---------|----------------------------------------------|------|
| VC0050  | DNA topoisomerase I-related protein          | 2.29 |
| VC0060  | crcB protein <i>crcB</i>                     | 2.11 |
| VC0255  | rfbT-related protein                         | 4.63 |
| VC0258  | rfbT protein <i>rfbT</i>                     | 5.96 |
| VC0291  | NifR3/Smm1 family protein                    | 2.50 |
| VC0437  | GTP1/Obg family protein                      | 2.30 |
| VC0447  | DnaJ-related protein                         | 2.80 |
| VC0658  | c-di-GMP phosphodiesterase A-related protein | 3.01 |
| VC2042  | histone deacetylase/AcuC/AphA family protein | 2.18 |
| VCA0148 | TagA-related protein                         | 6.30 |

---

### Hypothetical Proteins

|        |                                |      |
|--------|--------------------------------|------|
| VC0037 | conserved hypothetical protein | 2.84 |
| VC0073 | conserved hypothetical protein | 3.04 |
| VC0106 | conserved hypothetical protein | 3.09 |
| VC0191 | conserved hypothetical protein | 5.38 |
| VC0254 | conserved hypothetical protein | 3.57 |
| VC0264 | conserved hypothetical protein | 2.19 |

|         |                                |       |
|---------|--------------------------------|-------|
| VC0271  | conserved hypothetical protein | 2.43  |
| VC0351  | conserved hypothetical protein | 2.36  |
| VC0438  | conserved hypothetical protein | 2.46  |
| VC0467  | conserved hypothetical protein | 2.21  |
| VC0635  | conserved hypothetical protein | 2.22  |
| VC0710  | conserved hypothetical protein | 2.76  |
| VC0842  | conserved hypothetical protein | 2.61  |
| VC0876  | conserved hypothetical protein | 4.55  |
| VC1105  | conserved hypothetical protein | 2.50  |
| VC1131  | conserved hypothetical protein | 3.23  |
| VC1587  | conserved hypothetical protein | 6.21  |
| VC1624  | conserved hypothetical protein | 3.10  |
| VC1723  | conserved hypothetical protein | 3.39  |
| VC2101  | conserved hypothetical protein | 2.93  |
| VC2113  | conserved hypothetical protein | 2.81  |
| VC2115  | conserved hypothetical protein | 2.58  |
| VC2532  | conserved hypothetical protein | 2.63  |
| VC2610  | conserved hypothetical protein | 2.90  |
| VC2620  | conserved hypothetical protein | 2.08  |
| VC2647  | conserved hypothetical protein | 5.20  |
| VC2736  | conserved hypothetical protein | 2.52  |
| VCA0091 | conserved hypothetical protein | 2.77  |
| VCA0107 | conserved hypothetical protein | 2.13  |
| VCA0243 | conserved hypothetical protein | 3.19  |
| VCA0640 | conserved hypothetical protein | 4.96  |
| VCA0641 | conserved hypothetical protein | 2.46  |
| VCA0703 | conserved hypothetical protein | 2.68  |
| VCA0753 | conserved hypothetical protein | 3.35  |
| VCA0769 | conserved hypothetical protein | 2.66  |
| VCA0927 | conserved hypothetical protein | 3.31  |
| VCA1004 | conserved hypothetical protein | 2.38  |
| VCA1072 | conserved hypothetical protein | 2.02  |
| VC0074  | hypothetical protein           | 4.58  |
| VC0292  | hypothetical protein           | 2.23  |
| VC0427  | hypothetical protein           | 3.41  |
| VC0511  | hypothetical protein           | 2.52  |
| VC0546  | hypothetical protein           | 6.85  |
| VC0865  | hypothetical protein           | 2.33  |
| VC0877  | hypothetical protein           | 3.41  |
| VC0895  | hypothetical protein           | 6.90  |
| VC1035  | hypothetical protein           | 2.76  |
| VC1078  | hypothetical protein           | 2.97  |
| VC1152  | hypothetical protein           | 5.45  |
| VC1191  | hypothetical protein           | 2.03  |
| VC1192  | hypothetical protein           | 2.44  |
| VC1221  | hypothetical protein           | 2.74  |
| VC1223  | hypothetical protein           | 3.48  |
| VC1262  | hypothetical protein           | 12.10 |
| VC1418  | hypothetical protein           | 2.50  |
| VC1419  | hypothetical protein           | 2.02  |

|         |                      |       |
|---------|----------------------|-------|
| VC1420  | hypothetical protein | 2.26  |
| VC1514  | hypothetical protein | 2.44  |
| VC1517  | hypothetical protein | 2.62  |
| VC1724  | hypothetical protein | 3.29  |
| VC1729  | hypothetical protein | 2.41  |
| VC1946  | hypothetical protein | 5.98  |
| VC1981  | hypothetical protein | 2.16  |
| VC1988  | hypothetical protein | 2.00  |
| VC2212  | hypothetical protein | 12.83 |
| VC2280  | hypothetical protein | 3.10  |
| VC2306  | hypothetical protein | 3.28  |
| VC2486  | hypothetical protein | 2.13  |
| VC2494  | hypothetical protein | 2.15  |
| VC2609  | hypothetical protein | 2.25  |
| VC2667  | hypothetical protein | 2.15  |
| VC2687  | hypothetical protein | 2.04  |
| VC2743  | hypothetical protein | 2.56  |
| VC2747  | hypothetical protein | 2.53  |
| VCA0020 | hypothetical protein | 2.61  |
| VCA0021 | hypothetical protein | 2.23  |
| VCA0033 | hypothetical protein | 2.02  |
| VCA0067 | hypothetical protein | 3.02  |
| VCA0162 | hypothetical protein | 3.81  |
| VCA0196 | hypothetical protein | 4.43  |
| VCA0236 | hypothetical protein | 2.48  |
| VCA0252 | hypothetical protein | 2.51  |
| VCA0272 | hypothetical protein | 2.77  |
| VCA0292 | hypothetical protein | 2.25  |
| VCA0342 | hypothetical protein | 5.99  |
| VCA0373 | hypothetical protein | 7.06  |
| VCA0434 | hypothetical protein | 2.62  |
| VCA0453 | hypothetical protein | 11.95 |
| VCA0547 | hypothetical protein | 2.84  |
| VCA0609 | hypothetical protein | 2.42  |
| VCA0648 | hypothetical protein | 2.34  |
| VCA0650 | hypothetical protein | 2.21  |
| VCA0701 | hypothetical protein | 2.59  |
| VCA0721 | hypothetical protein | 2.36  |
| VCA0735 | hypothetical protein | 2.17  |
| VCA0771 | hypothetical protein | 2.54  |
| VCA0821 | hypothetical protein | 2.28  |
| VCA0845 | hypothetical protein | 2.01  |
| VCA0899 | hypothetical protein | 2.40  |
| VCA0916 | hypothetical protein | 2.93  |
| VCA0959 | hypothetical protein | 4.87  |
| VCA0971 | hypothetical protein | 2.03  |
| VCA1070 | hypothetical protein | 7.36  |
| VCA1103 | hypothetical protein | 5.37  |
