# Supplementary material
Source: PubMed Central journal article supplement (PMC1479229)
Supplement: iai_74_6_3633__2.pdf [file iai_74_6_3633__2.pdf]

**TABLE S2.** Genes that are transcribed at a higher level in *V. cholerae* O1 El Tor biotype. Differentially expressed genes were determined using SAM software with  $\geq 2.0$  fold change in gene expression and False Discovery Rate (FDR)  $\leq 0.01$  as a criteria. Genes that are absent in classical biotype (17) and expressed in El Tor biotype under our experimental conditions are marked with asterisk (\*).

| <b>Gene ID / Main Cellular Roles</b>                             |                                                            | <b>Fold Change</b> |
|------------------------------------------------------------------|------------------------------------------------------------|--------------------|
| <b>Amino Acid Biosynthesis</b>                                   |                                                            |                    |
| VC0968                                                           | cysteine synthase A <i>cysK</i>                            | 2.17               |
| VC1977                                                           | aspartate aminotransferase putative                        | 3.70               |
| <b>Biosynthesis of Cofactors, Prosthetic Groups and Carriers</b> |                                                            |                    |
| VC0194                                                           | gamma-glutamyltranspeptidase <i>ggt</i>                    | 2.33               |
| VC1040                                                           | cob(I)alamin adenosyltransferase <i>cobA</i>               | 2.56               |
| <b>Cell Envelope</b>                                             |                                                            |                    |
| VC0430                                                           | immunogenic protein                                        | 2.22               |
| VC0502                                                           | type IV pilin putative                                     | 3.57               |
| VC1318                                                           | outer membrane protein OmpV <i>ompV</i>                    | 2.00               |
| VC1622                                                           | outer membrane protein putative                            | 11.11              |
| VCA0317                                                          | lipoprotein Blc <i>blc-1</i>                               | 2.13               |
| VCA0406                                                          | lipoprotein Blc <i>blc-3</i>                               | 2.00               |
| VCA0443                                                          | lipoprotein Blc <i>blc-4</i>                               | 2.33               |
| <b>Cellular Processes: Chemotaxis and Motility</b>               |                                                            |                    |
| VC1248                                                           | methyl-accepting chemotaxis protein                        | 5.00               |
| VC1298                                                           | methyl-accepting chemotaxis protein                        | 2.70               |
| VC1394                                                           | methyl-accepting chemotaxis protein                        | 2.70               |
| VC1395                                                           | chemotaxis protein CheY authentic frameshift <i>cheY-1</i> | 3.45               |
| VC1398                                                           | chemotaxis protein CheY <i>cheY-2</i>                      | 2.04               |
| VC1399                                                           | chemotaxis protein methyltransferase CheR <i>cheR-1</i>    | 2.13               |
| VC1401                                                           | protein-glutamate methylesterase CheB <i>cheB-1</i>        | 2.44               |
| VC1402                                                           | purine-binding chemotaxis protein Chew putative            | 3.03               |
| VC1403                                                           | methyl-accepting chemotaxis protein                        | 4.35               |
| VC1643                                                           | methyl-accepting chemotaxis protein                        | 5.26               |
| VC1763                                                           | chemotaxis protein MotB-related protein                    | 2.56               |
| VC1868                                                           | methyl-accepting chemotaxis protein                        | 2.04               |
| VC1967                                                           | methyl-accepting chemotaxis protein                        | 3.57               |
| VCA1096                                                          | chemotaxis protein CheY <i>cheY-4</i>                      | 4.17               |
| <b>Cellular Processes: Pathogenesis</b>                          |                                                            |                    |
| VC0408                                                           | MSHA pilin protein MshB <i>mshB</i>                        | 2.22               |
| VC0409                                                           | MSHA pilin protein MshA <i>mshA</i>                        | 2.33               |
| VC1450                                                           | RTX toxin activating protein <i>rtxC</i>                   | *                  |
| VC1621                                                           | agglutination protein                                      | 4.17               |
| VC1888                                                           | hemolysin-related protein                                  | 4.76               |
| VCA0219                                                          | haemolysin <i>hlyA</i>                                     | 2.78               |
| VCA0300                                                          | chloramphenicol acetyltransferase <i>cat</i>               | *                  |
| <b>Cellular Processes: Detoxification</b>                        |                                                            |                    |
| VC0731                                                           | antioxidant AhpC/Tsa family                                | 2.22               |
| VC1350                                                           | antioxidant putative                                       | 2.86               |
| VC1583                                                           | superoxide dismutase Cu-Zn <i>sodC</i>                     | 4.76               |

|                                                      |                                                             |       |
|------------------------------------------------------|-------------------------------------------------------------|-------|
| VC2694                                               | superoxide dismutase_Mn <i>sodA</i>                         | 2.94  |
| <b>Cellular Processes: Other</b>                     |                                                             |       |
| VC0076                                               | universal stress protein A <i>uspA</i>                      | 2.50  |
| VC0139                                               | DPS family protein                                          | 3.45  |
| VC1585                                               | catalase <i>katB</i>                                        | 4.55  |
| <b>Central Intermediary Metabolism</b>               |                                                             |       |
| VC0454                                               | glutaminase family protein                                  | 2.17  |
| VCA0274                                              | carbonic anhydrase <i>cah</i>                               | 2.38  |
| VCA0301                                              | oxidoreductase_short-chain dehydrogenase/reductase family   | 3.70  |
| VCA0316                                              | acetyltransferase_putative                                  | *     |
| VCA0328                                              | biphenyl-2_3-diol 1_2-dioxygenase III-related protein       | 4.55  |
| VCA0463                                              | biphenyl-2_3-diol 1_2-dioxygenase III-related protein       | 3.45  |
| VCA0523                                              | aminotransferase_class II                                   | 2.08  |
| VCA0798                                              | CbbY family protein                                         | 2.13  |
| <b>DNA Metabolism</b>                                |                                                             |       |
| VC0452                                               | A/G-specific adenine glycosylase <i>mutY</i>                | 2.08  |
| VC1765                                               | type I restriction enzyme HsdR_putative                     | 5.00  |
| <b>Energy Metabolism</b>                             |                                                             |       |
| VC0168                                               | cytochrome c5 <i>cycB</i>                                   | 2.56  |
| VC0432                                               | malate dehydrogenase <i>mdh</i>                             | 3.23  |
| VC0478                                               | fructose-bisphosphate aldolase_class II <i>fbaA</i>         | 2.17  |
| VC0574                                               | ubiquinol--cytochrome c reductase_cytochrome B <i>petB</i>  | 2.70  |
| VC0575                                               | ubiquinol--cytochrome c reductase_cytochrome c1 <i>petC</i> | 2.33  |
| VC0604                                               | aconitate hydratase 2 <i>acnB</i>                           | 2.04  |
| VC1336                                               | carboxyphosphoenolpyruvate phosphonmutase <i>prpB</i>       | 2.00  |
| VC1338                                               | aconitate hydratase 1 <i>acnA</i>                           | 2.50  |
| VC1439                                               | cytochrome c oxidase_subunit CcoP <i>ccoP</i>               | 2.04  |
| VC1440                                               | cytochrome c oxidase_subunit CcoQ <i>ccoQ</i>               | 2.08  |
| VC1558                                               | 6-phospho-beta-glucosidase <i>bglA</i>                      | 5.56  |
| VC1573                                               | fumarate hydratase_class II_aerobic <i>fumC</i>             | 5.88  |
| VC2091                                               | succinate dehydrogenase_cytochrome b556 subunit <i>sdhC</i> | 2.63  |
| VCA0136                                              | glycerophosphoryl diester phosphodiesterase <i>glpQ</i>     | 2.04  |
| VCA0277                                              | glycine cleavage system H protein <i>gcvH</i>               | 2.22  |
| <b>Fatty Acid and Phospholipid Metabolism</b>        |                                                             |       |
| VC2759                                               | fatty oxidation complex_beta subunit <i>fadA</i>            | 2.00  |
| VCA0688                                              | polyhydroxyalkanoic acid synthase <i>phaC</i>               | 11.11 |
| VCA0690                                              | acetyl-CoA acetyltransferase                                | 50.00 |
| VCA0691                                              | acetoacetyl-CoA reductase                                   | 25.00 |
| <b>Mobile and Extrachromosomal Element Functions</b> |                                                             |       |
| VC0516                                               | phage integrase                                             | *     |
| VC1452                                               | RstC protein <i>rstC</i>                                    | 2.44  |
| VC1455                                               | transcriptional repressor RstR <i>rstR-I</i>                | 20.00 |
| <b>Protein Fate</b>                                  |                                                             |       |
| VC0034                                               | thiol:disulfide interchange protein <i>tpcG</i>             | 2.63  |
| VC0354                                               | peptidyl-prolyl cis-trans isomerase_FKBP-type <i>fkpA</i>   | 2.08  |
| VC0566                                               | protease DO <i>htrA</i>                                     | 2.63  |
| VC2436                                               | outer membrane protein TolC <i>tolC</i>                     | 2.27  |
| VC2568                                               | peptidyl-prolyl cis-trans isomerase_FKBP-type <i>fklB</i>   | 2.86  |
| VCA0116                                              | clpB protein <i>clpB-2</i>                                  | 3.23  |
| VCA0223                                              | protease <i>prtV</i>                                        | 3.45  |

| <b>Protein Synthesis</b>                             |                                                                                                                         |      |
|------------------------------------------------------|-------------------------------------------------------------------------------------------------------------------------|------|
| VC0219                                               | ribosomal protein L33 <i>rpmG</i>                                                                                       | 3.33 |
| VC0878                                               | ribosomal protein_ L31P family                                                                                          | 2.33 |
| VC0879                                               | ribosomal protein L36_ putative                                                                                         | 2.56 |
| <b>Purine, Pyrimidines, Nucleosides, Nucleotides</b> |                                                                                                                         |      |
| VC0756                                               | nucleoside diphosphate kinase <i>ndk</i>                                                                                | 2.22 |
| VC1038                                               | uridine kinase <i>udk</i>                                                                                               | 2.08 |
| VC1916                                               | cytidylate kinase <i>cmk</i>                                                                                            | 2.04 |
| VCA0197                                              | GMP reductase <i>guaC</i>                                                                                               | 2.50 |
| <b>Regulatory Functions</b>                          |                                                                                                                         |      |
| VC0166                                               | transcriptional regulator_ TetR family                                                                                  | 2.38 |
| VC0176                                               | transcriptional regulator_ putative                                                                                     | *    |
| VC0330                                               | regulator of sigma D <i>rsd</i>                                                                                         | 2.94 |
| VC0665                                               | sigma-54 dependent transcriptional regulator <i>vpsR</i>                                                                | 2.17 |
| VC1081                                               | response regulator                                                                                                      | 2.27 |
| VC1085                                               | sensor histidine kinase                                                                                                 | 2.08 |
| VC1142                                               | cold shock-like protein CspD <i>cspD</i>                                                                                | 5.88 |
| VC1445                                               | sensor histidine kinase/response regulator                                                                              | 4.17 |
| VC2275                                               | transcriptional regulator Crl <i>crl</i>                                                                                | 2.44 |
| VC2530                                               | sigma-54 modulation protein_ putative                                                                                   | 2.27 |
| VCA0231                                              | transcriptional regulator_ AraC/XylS family                                                                             | 2.56 |
| VCA0697                                              | sensory box/GGDEF family protein                                                                                        | 7.14 |
| VCA1087                                              | anti-sigma F factor antagonist_ putative                                                                                | 4.00 |
| <b>Transport and Binding Proteins</b>                |                                                                                                                         |      |
| VC0164                                               | multidrug resistance protein_ putative                                                                                  | 2.38 |
| VC0171                                               | peptide ABC transporter_ periplasmic peptide-binding protein                                                            | 3.03 |
| VC0172                                               | peptide ABC transporter_ permease protein                                                                               | 2.78 |
| VC0173                                               | peptide ABC transporter_ permease protein                                                                               | 3.23 |
| VC0364                                               | bacterioferritin-associated ferredoxin <i>bfd</i>                                                                       | 2.27 |
| VC0488                                               | extracellular solute-binding protein_ putative                                                                          | 8.33 |
| VC0538                                               | thiosulfate ABC transporter_ periplasmic thiosulfate-binding protein <i>cysP</i>                                        | 2.13 |
| VC0608                                               | iron(III) ABC transporter_ periplasmic iron-compound-binding protein                                                    | 5.88 |
| VC0704                                               | spermidine/putrescine ABC transporter_ periplasmic spermidine/putrescine-binding protein_ putative                      | 3.45 |
| VC0774                                               | hypothetical protein                                                                                                    | 4.35 |
| VC0775                                               | vibriobactin synthetase_ amide synthase subunit VibH <i>vibH</i>                                                        | 2.13 |
| VC0776                                               | vibriobactin and enterobactin ABC transporter_ periplasmic ferric vibriobactin/enterobactin-binding protein <i>viuP</i> | 3.45 |
| VC0777                                               | vibriobactin and enterobactin ABC transporter_ permease protein <i>viuD</i>                                             | 2.56 |
| VC0784                                               | sodium/alanine symporter                                                                                                | 2.27 |
| VC1168                                               | proton/glutamate symporter <i>glpP-1</i>                                                                                | 4.00 |
| VC1325                                               | galactoside ABC transporter_ periplasmic D-galactose/D-glucose-binding protein <i>mglB</i>                              | 2.00 |
| VC1327                                               | galactoside ABC transporter_ ATP-binding protein <i>mglA</i>                                                            | 2.22 |
| VC1362                                               | amino acid ABC transporter_ periplasmic amino acid-binding protein                                                      | 2.78 |
| VC1424                                               | spermidine/putrescine ABC transporter_ periplasmic spermidine/putrescine-binding protein <i>potD-1</i>                  | 5.56 |
| VC1547                                               | biopolymer transport protein ExbB-related protein                                                                       | 2.17 |
| VC1658                                               | serine transporter <i>sdaC-2</i>                                                                                        | 6.67 |
| VC1861                                               | amino acid ABC transporter_ permease protein                                                                            | 3.85 |
| VC1862                                               | amino acid ABC transporter_ permease protein                                                                            | 5.88 |

|         |                                                                                                                  |      |
|---------|------------------------------------------------------------------------------------------------------------------|------|
| VC1863  | amino acid ABC transporter_ periplasmic amino acid-binding protein                                               | 4.55 |
| VC1864  | amino acid ABC transporter_ ATP-binding protein                                                                  | 2.33 |
| VC2012  | sodium-dependent transporter                                                                                     | 7.69 |
| VC2210  | vibriobactin utilization protein ViuB <i>viuB</i>                                                                | 2.38 |
| VC2211  | ferric vibriobactin receptor <i>viuA</i>                                                                         | 2.70 |
| VCA0227 | vibriobactin and enterobactin ABC transporter_ periplasmic vibriobactin/enterobactin-binding protein <i>vctP</i> | 5.88 |
| VCA0576 | heme transport protein HutA <i>hutA</i>                                                                          | 9.09 |
| VCA0612 | large-conductance mechanosensitive channel <i>mscL</i>                                                           | 4.76 |
| VCA0759 | arginine ABC transporter_ periplasmic arginine-binding protein <i>artI</i>                                       | 2.38 |
| VCA0910 | tonB1 protein <i>tonB1</i>                                                                                       | 2.94 |
| VCA0911 | TonB system transport protein ExbB1 <i>exbB1</i>                                                                 | 4.17 |
| VCA0912 | TonB system transport protein ExbD1 <i>exbD1</i>                                                                 | 3.23 |
| VCA0915 | hemin ABC transporter_ ATP-binding protein HutD <i>hutD</i>                                                      | 2.38 |
| VCA0978 | amino acid ABC transporter_ periplasmic amino acid-binding protein_ putative                                     | 2.22 |
| VCA0996 | ABC transporter_ ATP-binding protein                                                                             | 2.17 |
| VCA1039 | amino acid ABC transporter_ periplasmic amino acid-binding protein                                               | 2.13 |

---

#### Unkown Function

|         |                                            |       |
|---------|--------------------------------------------|-------|
| VC0036  | FixG-related protein                       | 3.33  |
| VC0178  | patatin family protein                     | *     |
| VC1415  | hcp protein <i>hcp-1</i>                   | 16.67 |
| VC1599  | GGDEF family protein                       | 2.78  |
| VC1754  | paraquat-inducible protein B <i>pqiB</i>   | 2.00  |
| VCA0017 | hcp protein <i>hcp-2</i>                   | 16.67 |
| VCA0324 | DNA-damage-inducible protein J <i>dinJ</i> | 3.33  |
| VCA0628 | SecA-related protein                       | 8.33  |
| VCA0785 | GGDEF family protein                       | 2.13  |
| VCA0878 | integrase-related protein                  | 2.27  |

---

#### VPS Biosynthesis

|        |                           |      |
|--------|---------------------------|------|
| VC0928 | hypothetical protein      | 4.55 |
| VC0929 | hypothetical protein      | 3.70 |
| VC0930 | hemolysin-related protein | 8.33 |

---

#### Hypothetical Proteins

|        |                                |      |
|--------|--------------------------------|------|
| VC0180 | conserved hypothetical protein | *    |
| VC0181 | conserved hypothetical protein | *    |
| VC0480 | conserved hypothetical protein | 2.13 |
| VC0490 | conserved hypothetical protein | *    |
| VC0503 | conserved hypothetical protein | *    |
| VC0559 | conserved hypothetical protein | 2.04 |
| VC0628 | conserved hypothetical protein | 2.63 |
| VC0957 | conserved hypothetical protein | 2.04 |
| VC1009 | conserved hypothetical protein | 4.00 |
| VC1332 | conserved hypothetical protein | 5.26 |
| VC1334 | conserved hypothetical protein | 5.26 |
| VC1433 | conserved hypothetical protein | 2.38 |
| VC1492 | conserved hypothetical protein | 9.09 |
| VC1576 | conserved hypothetical protein | 2.63 |
| VC1712 | conserved hypothetical protein | 7.69 |
| VC1872 | conserved hypothetical protein | 9.09 |
| VC1873 | conserved hypothetical protein | 5.26 |

|         |                                |       |
|---------|--------------------------------|-------|
| VC1874  | conserved hypothetical protein | 8.33  |
| VC2386  | conserved hypothetical protein | 4.00  |
| VC2706  | conserved hypothetical protein | 16.67 |
| VCA0037 | conserved hypothetical protein | 2.08  |
| VCA0048 | conserved hypothetical protein | 4.55  |
| VCA0105 | conserved hypothetical protein | 2.33  |
| VCA0154 | conserved hypothetical protein | 3.70  |
| VCA0309 | conserved hypothetical protein | 3.70  |
| VCA0323 | conserved hypothetical protein | 10.00 |
| VCA0332 | conserved hypothetical protein | 14.29 |
| VCA0345 | conserved hypothetical protein | 11.11 |
| VCA0689 | conserved hypothetical protein | 50.00 |
| VCA0903 | conserved hypothetical protein | 5.00  |
| VCA1054 | conserved hypothetical protein | 3.57  |
| VCA1083 | conserved hypothetical protein | 2.04  |
| VCA1097 | conserved hypothetical protein | 5.26  |
| VC0102  | hypothetical protein           | 4.76  |
| VC0179  | hypothetical protein           | *     |
| VC0182  | hypothetical protein           | *     |
| VC0493  | hypothetical protein           | *     |
| VC0504  | hypothetical protein           | 50.00 |
| VC0712  | hypothetical protein           | 2.44  |
| VC0955  | hypothetical protein           | 2.33  |
| VC0996  | hypothetical protein           | 2.22  |
| VC1116  | hypothetical protein           | 6.25  |
| VC1197  | hypothetical protein           | 2.50  |
| VC1247  | hypothetical protein           | 2.56  |
| VC1323  | hypothetical protein           | 2.27  |
| VC1333  | hypothetical protein           | 12.50 |
| VC1384  | hypothetical protein           | 2.44  |
| VC1389  | hypothetical protein           | 2.63  |
| VC1396  | hypothetical protein           | 2.44  |
| VC1449  | hypothetical protein           | *     |
| VC1548  | hypothetical protein           | 2.63  |
| VC1572  | hypothetical protein           | 2.63  |
| VC1575  | hypothetical protein           | 2.08  |
| VC1620  | hypothetical protein           | 4.35  |
| VC1742  | hypothetical protein           | 2.27  |
| VC1743  | hypothetical protein           | 2.04  |
| VC1771  | hypothetical protein           | 5.00  |
| VC1865  | hypothetical protein           | 3.57  |
| VC1933  | hypothetical protein           | 2.94  |
| VC1999  | hypothetical protein           | 3.03  |
| VC2010  | hypothetical protein           | 2.08  |
| VCA0032 | hypothetical protein           | 3.70  |
| VCA0078 | hypothetical protein           | 2.56  |
| VCA0081 | hypothetical protein           | 2.94  |
| VCA0109 | hypothetical protein           | 3.57  |
| VCA0112 | hypothetical protein           | 3.33  |
| VCA0114 | hypothetical protein           | 2.94  |

|               |                                                                                    |       |
|---------------|------------------------------------------------------------------------------------|-------|
| VCA0224       | hypothetical protein                                                               | 2.63  |
| VCA0283       | hypothetical protein                                                               | 3.13  |
| VCA0294       | hypothetical protein                                                               | 5.26  |
| VCA0298       | hypothetical protein                                                               | 4.35  |
| VCA0299       | hypothetical protein                                                               | 9.09  |
| VCA0307       | hypothetical protein                                                               | 6.67  |
| VCA0330       | hypothetical protein                                                               | 4.55  |
| VCA0331       | hypothetical protein                                                               | 4.00  |
| VCA0333       | hypothetical protein                                                               | 12.50 |
| VCA0340       | hypothetical protein                                                               | 4.35  |
| VCA0344       | hypothetical protein                                                               | 2.08  |
| VCA0376       | hypothetical protein                                                               | 3.85  |
| VCA0379       | hypothetical protein                                                               | 2.13  |
| VCA0380       | hypothetical protein                                                               | 3.85  |
| VCA0405       | hypothetical protein                                                               | 2.04  |
| VCA0420       | hypothetical protein                                                               | 2.08  |
| VCA0430       | hypothetical protein                                                               | 2.44  |
| VCA0448       | hypothetical protein                                                               | 6.67  |
| VCA0611       | hypothetical protein                                                               | 3.23  |
| VCA0645       | hypothetical protein                                                               | 2.70  |
| VCA0728       | hypothetical protein                                                               | *     |
| VCA0730       | hypothetical protein                                                               | *     |
| VCA0849       | hypothetical protein                                                               | 2.13  |
| VCA0880       | hypothetical protein                                                               | 2.08  |
| VCA0882       | hypothetical protein                                                               | 3.70  |
| VCA0883       | hypothetical protein                                                               | 14.29 |
| VCA0935       | hypothetical protein                                                               | 5.26  |
| VCA0976       | hypothetical protein                                                               | 2.56  |
| VCA0980       | hypothetical protein                                                               | 3.13  |
| VCA0981       | hypothetical protein                                                               | 2.44  |
| VCA1035       | hypothetical protein                                                               | 2.04  |
| <hr/>         |                                                                                    |       |
| <b>Others</b> |                                                                                    |       |
| VC1935        | CDP-diacylglycerol--glycerol-3-phosphate 3-phosphatidyltransferase-related protein | 2.17  |
| VCA0346       | H-REV 107-related protein                                                          | 8.33  |
| VCA0907       | heme-binding protein HutZ <i>hutZ</i>                                              | 10.00 |
| VCA0908       | hutX protein <i>hutX</i>                                                           | 5.88  |
