# Supplementary material
Source: PubMed Central journal article supplement (PMC1479229)
Supplement: iai_74_6_3633__3.pdf [file iai_74_6_3633__3.pdf]

**TABLE S3.** Genes that are differentially transcribed in C- $\Delta$ *vieA* relative to C-wt. Differentially expressed genes were determined using SAM software with  $\geq 2.0$  fold change in gene expression and False Discovery Rate (FDR)  $\leq 0.01$  as criteria. List of VpsR and  $\sigma^E$  regulated genes were obtained from previously published transcriptome data (12, 56).  $\sigma^E$  regulated genes were selected using  $\geq 1.5$  fold change in gene expression and P-value  $\leq 0.1$  as criteria from published supplementary data (12) and VpsR regulated genes were selected using  $\geq 1.5$  fold change in gene expression and FDR  $\leq 0.01$  as criteria from published supplementary data (56). Positively and negatively regulated genes by VpsR and  $\sigma^E$  are shown as plus (+) and minus (-), respectively.

| Gene ID / Main Cellular Roles                                     |                                                                                                                                 | Fold Change | Regulated By            |
|-------------------------------------------------------------------|---------------------------------------------------------------------------------------------------------------------------------|-------------|-------------------------|
| <b>Amino Acid Biosynthesis</b>                                    |                                                                                                                                 |             |                         |
| VC0030                                                            | acetolactate synthase II_ small subunit <i>ilvM</i>                                                                             | 2.67        |                         |
| VC1590                                                            | acetolactate synthase <i>ilvK</i>                                                                                               | 2.10        |                         |
| <b>Biosynthesis of Cofactors, Prosthetic Groups, and Carriers</b> |                                                                                                                                 |             |                         |
| VC0064                                                            | Thiamine thiS protein <i>thiS</i>                                                                                               | 0.43        |                         |
| VC0194                                                            | gamma-glutamyltranspeptidase <i>ggt</i>                                                                                         | 2.21        | VpsR(+)                 |
| VC0472                                                            | S-adenosylmethionine synthase <i>metK</i>                                                                                       | 0.48        |                         |
| VC2254                                                            | 1-deoxy-D-xylulose 5-phosphate reductoisomerase <i>dxr</i>                                                                      | 2.57        |                         |
| VCA0723                                                           | 3-hydroxy-3-methylglutaryl CoA reductase <i>hmgA</i>                                                                            | 2.62        |                         |
| <b>Cell Envelope</b>                                              |                                                                                                                                 |             |                         |
| VC0240                                                            | ADP-L-glycero-D-mannoheptose-6-epimerase <i>rfaD</i>                                                                            | 0.50        |                         |
| VC0533                                                            | lipoprotein NlpD <i>nlpD</i>                                                                                                    | 0.26        |                         |
| VC0602                                                            | penicillin-binding protein 1B <i>mrcB</i>                                                                                       | 3.21        |                         |
| VC0700                                                            | soluble lytic murein transglycosylase <i>slt</i>                                                                                | 4.66        | VpsR(+)                 |
| VC1195                                                            | lipoprotein_ putative                                                                                                           | 2.32        |                         |
| VC1622                                                            | outer membrane protein_ putative                                                                                                | 3.35        |                         |
| VC1956                                                            | lytic murein transglycosylase_ putative                                                                                         | 2.59        | $\sigma^E$ (+)          |
| VC1962                                                            | lipoprotein                                                                                                                     | 5.76        | $\sigma^E$ (-), VpsR(+) |
| VC2213                                                            | outer membrane protein OmpA <i>ompA</i>                                                                                         | 2.57        | $\sigma^E$ (-)          |
| VC2247                                                            | lipid-A-disaccharide synthase <i>lpxB</i>                                                                                       | 2.36        |                         |
| VC2251                                                            | outer membrane protein OmpH <i>ompH</i>                                                                                         | 2.56        |                         |
| VC2400                                                            | UDP-N-acetylmuramate--alanine ligase <i>murC</i>                                                                                | 2.14        |                         |
| VC2401                                                            | UDP-N-acetylglucosamine--N-acetylmuramyl-(pentapeptide) pyrophosphoryl-undecaprenol N-acetylglucosamine transferase <i>murG</i> | 2.16        |                         |
| VC2406                                                            | UDP-N-acetylmuramoylalanyl-D-glutamate--2_6-diaminopimelate ligase <i>murE</i>                                                  | 2.18        |                         |
| VC2514                                                            | UDP-N-acetylglucosamine 1-carboxyvinyltransferase <i>murA</i>                                                                   | 2.16        |                         |
| VCA0867                                                           | outer membrane protein OmpW <i>ompW</i>                                                                                         | 0.47        | $\sigma^E$ (-)          |
| <b>Cellular Processes: Chemotaxis and Motility</b>                |                                                                                                                                 |             |                         |
| VC0216                                                            | methyl-accepting chemotaxis protein                                                                                             | 0.40        |                         |
| VC1008                                                            | sodium-type flagellar protein MotY <i>motY</i>                                                                                  | 0.41        |                         |
| VC1248                                                            | methyl-accepting chemotaxis protein                                                                                             | 0.42        |                         |
| VC1289                                                            | methyl-accepting chemotaxis protein                                                                                             | 0.33        |                         |
| VC1298                                                            | methyl-accepting chemotaxis protein                                                                                             | 0.42        |                         |
| VC1413                                                            | methyl-accepting chemotaxis protein                                                                                             | 0.33        | VpsR(-)                 |
| VC1602                                                            | chemotaxis protein CheV <i>cheV-I</i>                                                                                           | 0.47        |                         |
| VC1898                                                            | methyl-accepting chemotaxis protein                                                                                             | 0.30        |                         |
| VC2059                                                            | purine-binding chemotaxis protein CheW <i>cheW-I</i>                                                                            | 0.50        |                         |
| VC2064                                                            | chemotaxis protein CheZ <i>cheZ</i>                                                                                             | 0.44        |                         |

|         |                                                                 |      |         |
|---------|-----------------------------------------------------------------|------|---------|
| VC2065  | chemotaxis protein CheY <i>cheY-3</i>                           | 0.48 |         |
| VC2068  | flagellar biosynthetic protein FlhF_ <i>putative</i>            | 0.43 |         |
| VC2069  | flagellar biosynthetic protein FlhA <i>flhA</i>                 | 0.36 |         |
| VC2128  | flagellar hook-length control protein FliK_ <i>putative</i>     | 0.29 |         |
| VC2130  | flagellum-specific ATP synthase FliI <i>fliI</i>                | 0.48 |         |
| VC2131  | flagellar assembly protein FliH_ <i>putative</i>                | 0.50 |         |
| VC2134  | flagellar hook-basal body complex protein FliE <i>fliE</i>      | 0.47 |         |
| VC2138  | flagellar protein FliS <i>fliS</i>                              | 0.36 |         |
| VC2141  | flagellin FlaG <i>flaG</i>                                      | 0.25 |         |
| VC2142  | flagellin FlaB <i>flaB</i>                                      | 0.16 |         |
| VC2143  | flagellin FlaD <i>flaD</i>                                      | 0.11 |         |
| VC2144  | flagellin FlaE <i>flaE</i>                                      | 0.27 |         |
| VC2161  | methyl-accepting chemotaxis protein                             | 0.22 |         |
| VC2187  | flagellin FlaC <i>flaC</i>                                      | 0.13 |         |
| VC2188  | flagellin core protein A <i>flaA</i>                            | 0.12 |         |
| VC2190  | flagellar hook-associated protein FlgL <i>flgL</i>              | 0.44 |         |
| VC2191  | flagellar hook-associated protein FlgM <i>flgM</i>              | 0.18 |         |
| VC2192  | flagellar protein FlgJ <i>flgJ</i>                              | 0.41 |         |
| VC2194  | flagellar L-ring protein FlgH <i>flgH</i>                       | 0.38 |         |
| VC2195  | flagellar basal-body rod protein FlgG <i>flgG</i>               | 0.24 |         |
| VC2197  | flagellar hook protein FlgE <i>flgE</i>                         | 0.32 |         |
| VC2198  | basal-body rod modification protein FlgD <i>flgD</i>            | 0.46 |         |
| VC2200  | flagellar basal-body rod protein FlgB <i>flgB</i>               | 0.13 |         |
| VC2204  | negative regulator of flagellin synthesis FlgM_ <i>putative</i> | 0.46 |         |
| VC2601  | sodium-type flagellar protein MotX <i>motX</i>                  | 0.34 |         |
| VCA0864 | methyl-accepting chemotaxis protein                             | 4.32 | VpsR(+) |
| VCA0954 | chemotaxis protein CheV_ <i>putative</i>                        | 0.37 |         |

---

**Cellular Processes: Pathogenesis**

---

|         |                                                                            |      |  |
|---------|----------------------------------------------------------------------------|------|--|
| VC0824  | tagD protein <i>tagD</i>                                                   | 0.31 |  |
| VC0825  | toxin co-regulated pilus biosynthesis protein I <i>tcpI</i>                | 0.24 |  |
| VC0827  | toxin co-regulated pilus biosynthesis protein H <i>tcpH</i>                | 0.49 |  |
| VC0830  | toxin co-regulated pilus biosynthesis protein Q <i>tcpQ</i>                | 0.20 |  |
| VC0831  | toxin co-regulated pilus biosynthesis outer membrane protein C <i>tcpC</i> | 0.32 |  |
| VC0832  | toxin co-regulated pilus biosynthesis protein R <i>tcpR</i>                | 0.26 |  |
| VC0833  | toxin co-regulated pilus biosynthesis protein D <i>tcpD</i>                | 0.17 |  |
| VC0834  | toxin co-regulated pilus biosynthesis protein S <i>tcpS</i>                | 0.23 |  |
| VC0835  | toxin co-regulated pilus biosynthesis protein T <i>tcpT</i>                | 0.25 |  |
| VC0836  | toxin co-regulated pilus biosynthesis protein E <i>tcpE</i>                | 0.28 |  |
| VC0837  | toxin co-regulated pilus biosynthesis protein F <i>tcpF</i>                | 0.23 |  |
| VC0838  | TCP pilus virulence regulatory protein <i>tcpN/toxT</i>                    | 0.34 |  |
| VC0839  | leader peptidase TcpJ <i>tcpJ</i>                                          | 0.39 |  |
| VC0840  | accessory colonization factor AcfB <i>acfB</i>                             | 0.37 |  |
| VC0841  | accessory colonization factor AcfC <i>acfC</i>                             | 0.39 |  |
| VC0843  | tagE protein <i>tagE-1</i>                                                 | 0.49 |  |
| VC0844  | accessory colonization factor AcfA <i>acfA</i>                             | 0.21 |  |
| VC1451  | RTX toxin RtxA <i>rtxA</i>                                                 | 2.01 |  |
| VC2724  | cholera toxin secretion protein EpsM <i>epsM</i>                           | 3.03 |  |
| VCA0594 | hemolysin <i>hly</i>                                                       | 2.30 |  |

---

**Cellular Processes: Other**

---

|        |                                         |      |         |
|--------|-----------------------------------------|------|---------|
| VC1583 | superoxide dismutase_ <i>Cu-Zn sodC</i> | 2.03 | VpsR(+) |
|--------|-----------------------------------------|------|---------|

|                                               |                                                                                                 |      |                         |
|-----------------------------------------------|-------------------------------------------------------------------------------------------------|------|-------------------------|
| VC1676                                        | phage shock protein C <i>pspC</i>                                                               | 2.89 | $\sigma^E$ (-)          |
| VC1678                                        | phage shock protein A <i>pspA</i>                                                               | 3.01 | $\sigma^E$ (-)          |
| VC2402                                        | cell division protein FtsW <i>ftsW</i>                                                          | 2.12 |                         |
| VC2451                                        | GTP pyrophosphokinase <i>relA</i>                                                               | 3.97 |                         |
| <b>Central Intermediary Metabolism</b>        |                                                                                                 |      |                         |
| VC0606                                        | nitrogen regulatory protein P-II <i>glnB-1</i>                                                  | 0.45 |                         |
| VC1945                                        | FAD monooxygenase_ PheA/TfdB family                                                             | 8.80 |                         |
| VC2231                                        | oxidoreductase_ acyl-CoA dehydrogenase family                                                   | 2.22 |                         |
| VC2239                                        | nitrogen regulatory protein P-II <i>glnB-2</i>                                                  | 2.30 | $\sigma^E$ (+)          |
| VC2240                                        | decarboxylase                                                                                   | 2.99 | $\sigma^E$ (+), VpsR(+) |
| VC2559                                        | sulfate adenylate transferase_ subunit 1 <i>cysN</i>                                            | 2.02 | VpsR(-)                 |
| VCA0316                                       | acetyltransferase_ putative                                                                     | 2.03 |                         |
| VCA0824                                       | diaminobutyrate--pyruvate aminotransferase <i>ectB</i>                                          | 2.12 |                         |
| VCA0947                                       | spermidine n1-acetyltransferase <i>speG</i>                                                     | 2.43 | VpsR(+)                 |
| <b>DNA Metabolism</b>                         |                                                                                                 |      |                         |
| VC1672                                        | DNA-3-methyladenine glycosidase I <i>tag</i>                                                    | 3.67 |                         |
| VC1814                                        | deoxyribodipyrimidine photolyase <i>phrB-1</i>                                                  | 2.67 |                         |
| VC1919                                        | DNA-binding protein HU-beta <i>hupB</i>                                                         | 0.48 |                         |
| VC2417                                        | single-stranded-DNA-specific exonuclease RecJ <i>recJ</i>                                       | 2.19 | $\sigma^E$ (+)          |
| VCA1017                                       | methylated-DNA--protein-cysteine S-methyltransferase <i>ogt</i>                                 | 2.19 |                         |
| <b>Energy Metabolism</b>                      |                                                                                                 |      |                         |
| VC0168                                        | cytochrome c5 <i>cycB</i>                                                                       | 0.40 |                         |
| VC0298                                        | acetyl-CoA synthase <i>acs-1</i>                                                                | 2.44 |                         |
| VC0432                                        | malate dehydrogenase <i>mdh</i>                                                                 | 0.49 |                         |
| VC0574                                        | ubiquinol--cytochrome c reductase_ cytochrome B <i>petB</i>                                     | 0.37 |                         |
| VC0575                                        | ubiquinol--cytochrome c reductase_ cytochrome c1 <i>petC</i>                                    | 0.42 |                         |
| VC0769                                        | chitinase_ putative                                                                             | 4.37 |                         |
| VC0819                                        | aldehyde dehydrogenase <i>aldA-1</i>                                                            | 0.34 |                         |
| VC1242                                        | succinylglutamate desuccinylase <i>astE</i>                                                     | 0.48 |                         |
| VC1300                                        | L-serine dehydratase 1 <i>sdaA-1</i>                                                            | 0.49 |                         |
| VC1337                                        | methylcitrate synthase <i>prpC</i>                                                              | 2.06 |                         |
| VC1338                                        | aconitate hydratase 1 <i>acnA</i>                                                               | 2.41 |                         |
| VC1439                                        | cytochrome c oxidase_ subunit CcoP <i>ccoP</i>                                                  | 0.39 |                         |
| VC1440                                        | cytochrome c oxidase_ subunit CcoQ <i>ccoQ</i>                                                  | 0.47 |                         |
| VC1441                                        | cytochrome c oxidase_ subunit CcoO <i>ccoO</i>                                                  | 0.36 |                         |
| VC1442                                        | cytochrome c oxidase_ subunit CcoN <i>ccoN</i>                                                  | 0.32 |                         |
| VC1515                                        | chaperone_ formate dehydrogenase-specific_ putative                                             | 2.71 |                         |
| VC1573                                        | fumarate hydratase_ class II_ aerobic <i>fumC</i>                                               | 4.38 |                         |
| VC1693                                        | cytochrome c-type protein TorC <i>torC</i>                                                      | 0.47 |                         |
| VC2291                                        | NADH:ubiquinone oxidoreductase_ Na translocating_ hydrophobic membrane protein NqrE <i>nqrE</i> | 0.45 |                         |
| VC2698                                        | aspartate ammonia-lyase <i>aspA</i>                                                             | 0.35 | VpsR(-)                 |
| VCA0136                                       | glycerophosphoryl diester phosphodiesterase <i>glpQ</i>                                         | 0.37 | VpsR(-)                 |
| VCA0140                                       | spindolin-related protein                                                                       | 2.66 |                         |
| VCA0538                                       | cytochrome b561_ putative                                                                       | 3.03 |                         |
| VCA0700                                       | chitodextrinase                                                                                 | 2.29 |                         |
| VCA0811                                       | chitinase_ putative                                                                             | 6.68 | VpsR(+)                 |
| VCA0828                                       | phenylalanine-4-hydroxylase <i>phhA</i>                                                         | 0.34 |                         |
| <b>Fatty Acid and Phospholipid Metabolism</b> |                                                                                                 |      |                         |
| VC1063                                        | acyl-CoA thioesterase II <i>tesB</i>                                                            | 0.45 |                         |

|         |                                            |      |                |
|---------|--------------------------------------------|------|----------------|
| VCA0035 | phosphatidylglycerophosphatase B_ putative | 3.76 | $\sigma^E$ (-) |
| VCA0690 | acetyl-CoA acetyltransferase               | 2.02 |                |

---

### Mobile and Extrachromosomal Element Functions

---

|        |                                                |      |  |
|--------|------------------------------------------------|------|--|
| VC0516 | phage integrase                                | 2.04 |  |
| VC0818 | transposase_ putative authentic point mutation | 2.14 |  |
| VC0846 | integrase_ degenerate                          | 0.40 |  |
| VC1455 | transcriptional repressor RstR <i>rstR-1</i>   | 2.04 |  |

---

### Protein Fate

---

|         |                                                                          |       |                |
|---------|--------------------------------------------------------------------------|-------|----------------|
| VC0034  | thiol:disulfide interchange protein <i>tpcG</i>                          | 2.03  | $\sigma^E$ (+) |
| VC0157  | alkaline serine protease                                                 | 28.05 | VpsR(+)        |
| VC0354  | peptidyl-prolyl cis-trans isomerase_ FKBP-type <i>fkpA</i>               | 2.47  |                |
| VC0554  | protease_ insulinase family/protease_ insulinase family                  | 2.60  |                |
| VC0566  | protease DO <i>htrA</i>                                                  | 4.47  | $\sigma^E$ (+) |
| VC1107  | outer membrane lipoproteins carrier protein <i>lola</i>                  | 2.21  | $\sigma^E$ (-) |
| VC1674  | periplasmic linker protein_ putative                                     | 3.34  | $\sigma^E$ (-) |
| VC1709  | zinc protease_ insulinase family                                         | 0.42  | VpsR(-)        |
| VC2723  | general secretion pathway protein N <i>epsN</i>                          | 2.49  |                |
| VC2725  | general secretion pathway protein L <i>epsL</i>                          | 2.55  |                |
| VC2726  | general secretion pathway protein K <i>epsK</i>                          | 2.23  | VpsR(+)        |
| VC2727  | general secretion pathway protein J <i>epsJ</i>                          | 2.91  | VpsR(+)        |
| VC2730  | general secretion pathway protein G <i>epsG</i>                          | 2.02  |                |
| VC2731  | general secretion pathway protein F <i>epsF</i>                          | 2.15  | VpsR(+)        |
| VC2732  | general secretion pathway protein E <i>epsE</i>                          | 2.01  | VpsR(+)        |
| VC2733  | general secretion pathway protein D_ authentic frameshift <i>gspD</i>    | 2.63  | VpsR(+)        |
| VCA0223 | protease <i>prtV</i>                                                     | 2.06  |                |
| VCA0692 | protein-export membrane protein SecF_ authentic frameshift <i>secF-2</i> | 2.12  |                |

---

### Protein Synthesis

---

|        |                                             |      |         |
|--------|---------------------------------------------|------|---------|
| VC0007 | ribosomal protein L34 <i>rpmH</i>           | 0.46 |         |
| VC2452 | TrmA family RNA methyltransferase_ putative | 3.51 |         |
| VC2679 | ribosomal protein L31 <i>rpmE</i>           | 0.40 | VpsR(+) |

---

### Purine, Pyrimidines, Nucleosides, Nucleotides

---

|        |                                                       |      |         |
|--------|-------------------------------------------------------|------|---------|
| VC1034 | uridine phosphorylase <i>udp-1</i>                    | 0.38 | VpsR(-) |
| VC2277 | xanthine-guanine phosphoribosyltransferase <i>gpt</i> | 0.46 |         |

---

### Regulatory Functions

---

|         |                                                                         |      |                |
|---------|-------------------------------------------------------------------------|------|----------------|
| VC0192  | transcriptional regulator_ AraC/XylS family                             | 2.71 |                |
| VC0665  | sigma-54 dependent transcriptional regulator <i>vpsR</i>                | 7.08 |                |
| VC1082  | response regulator                                                      | 0.35 |                |
| VC1142  | cold shock-like protein CspD <i>cspD</i>                                | 2.17 |                |
| VC1638  | DNA-binding response regulator                                          | 6.77 | $\sigma^E$ (-) |
| VC1639  | sensor histidine kinase                                                 | 7.75 | $\sigma^E$ (-) |
| VC1651  | response regulator VieB <i>vieB</i>                                     | 0.20 |                |
| VC1653  | sensory box sensor histidine kinase/response regulator VieS <i>vieS</i> | 0.28 |                |
| VC1825  | transcriptional regulator                                               | 2.10 |                |
| VC1947  | transcriptional regulator_ LysR family                                  | 5.38 | $\sigma^E$ (-) |
| VC2464  | sigma-E factor regulatory protein RseC <i>rseC</i>                      | 2.04 | $\sigma^E$ (+) |
| VC2465  | sigma-E factor regulatory protein RseB <i>rseB</i>                      | 3.09 | $\sigma^E$ (+) |
| VC2466  | sigma-E factor negative regulatory protein RseA <i>rseA</i>             | 4.07 | $\sigma^E$ (+) |
| VC2516  | anti-sigma B factor antagonist_ putative                                | 2.92 | $\sigma^E$ (-) |
| VCA0239 | transcriptional regulator                                               | 2.09 | VpsR(+)        |
| VCA0257 | sensor histidine kinase                                                 | 2.47 |                |

|                                       |                                                                                                    |      |                |
|---------------------------------------|----------------------------------------------------------------------------------------------------|------|----------------|
| VCA0565                               | sensor histidine kinase                                                                            | 2.05 |                |
| VCA0566                               | transcriptional regulator                                                                          | 2.44 |                |
| VCA0888                               | transcriptional regulator_ LuxR family                                                             | 2.28 | VpsR(+)        |
| VCA0917                               | transcriptional regulator_ TetR family                                                             | 3.88 | VpsR(+)        |
| VCA0952                               | transcriptional regulator_ LuxR family <i>vpsT</i>                                                 | 6.83 | VpsR(+)        |
| <b>Transcription</b>                  |                                                                                                    |      |                |
| VC0150                                | RNA polymerase sigma-32 factor <i>rpoH</i>                                                         | 2.06 |                |
| VC0159                                | RNA-binding protein                                                                                | 0.37 |                |
| VC2467                                | RNA polymerase sigma-E factor <i>rpoE</i>                                                          | 3.11 |                |
| <b>Transport and Binding Proteins</b> |                                                                                                    |      |                |
| VC0172                                | peptide ABC transporter_ permease protein                                                          | 0.43 |                |
| VC0284                                | TonB system receptor_ authentic point mutation                                                     | 2.02 |                |
| VC0704                                | spermidine/putrescine ABC transporter_ periplasmic spermidine/putrescine-binding protein_ putative | 2.59 | VpsR(-)        |
| VC0724                                | phosphate ABC transporter_ permease protein <i>pstC-1</i>                                          | 2.20 |                |
| VC0995                                | PTS system_ N-acetylglucosamine-specific IIBC component <i>nagE</i>                                | 2.39 |                |
| VC1042                                | long-chain fatty acid transport protein <i>fadL-1</i>                                              | 2.45 |                |
| VC1301                                | serine transporter <i>sdaC-1</i>                                                                   | 0.34 | VpsR(-)        |
| VC1328                                | galactoside ABC transporter_ permease protein <i>mgIC</i>                                          | 2.17 |                |
| VC1486                                | ABC transporter_ ATP-binding protein                                                               | 3.30 | $\sigma^E$ (+) |
| VC1549                                | glycerol-3-phosphate ABC transporter_ periplasmic glycerol-3-phosphate-binding protein <i>ugpB</i> | 0.34 |                |
| VC1673                                | transporter_ AcrB/D/F family                                                                       | 3.38 |                |
| VC1675                                | multidrug resistance protein_ putative                                                             | 3.75 |                |
| VC1854                                | ompT protein <i>ompT</i>                                                                           | 0.30 | $\sigma^E$ (-) |
| VC1927                                | C4-dicarboxylate transport protein <i>dctM</i>                                                     | 2.20 |                |
| VC1928                                | C4-dicarboxylate transport protein DctQ_ putative                                                  | 3.04 |                |
| VC1929                                | C4-dicarboxylate-binding periplasmic protein <i>dctP-2</i>                                         | 2.51 |                |
| VC1944                                | PvcB protein <i>pvcB</i>                                                                           | 7.01 |                |
| VC2013                                | PTS system_ glucose-specific IIBC component <i>ptsG</i>                                            | 0.37 |                |
| VC2037                                | Na <sup>+</sup> /H <sup>+</sup> antiporter <i>yqkI</i>                                             | 0.48 | $\sigma^E$ (+) |
| VC2608                                | ABC transporter_ ATP-binding protein                                                               | 2.39 |                |
| VCA0025                               | transporter_ NadC family                                                                           | 0.48 |                |
| VCA0036                               | sodium/dicarboxylate symporter                                                                     | 0.43 |                |
| VCA0137                               | glycerol-3-phosphate transporter <i>glpT</i>                                                       | 0.48 | VpsR(-)        |
| VCA0576                               | heme transport protein HutA <i>hutA</i>                                                            | 2.70 |                |
| VCA0591                               | peptide ABC transporter_ periplasmic peptide-binding protein_ putative                             | 2.55 | $\sigma^E$ (+) |
| VCA0745                               | glycerol uptake facilitator protein_ authentic frameshift <i>glpF</i>                              | 0.46 |                |
| VCA0911                               | TonB system transport protein ExbB1 <i>exbB1</i>                                                   | 4.02 |                |
| VCA0912                               | TonB system transport protein ExbD1 <i>exbD1</i>                                                   | 2.37 | VpsR(-)        |
| VCA0914                               | hemin ABC transporter_ permease protein_ putative                                                  | 2.09 |                |
| <b>Unkown Function</b>                |                                                                                                    |      |                |
| VC0036                                | FixG-related protein                                                                               | 0.42 |                |
| VC0130                                | GGDEF family protein                                                                               | 0.49 |                |
| VC0595                                | glutamyl-tRNA synthetase-related protein                                                           | 2.27 |                |
| VC0851                                | small protein A <i>smpA</i>                                                                        | 2.07 | $\sigma^E$ (+) |
| VC1029                                | GGDEF family protein                                                                               | 2.96 | VpsR(+)        |
| VC1353                                | GGDEF family protein                                                                               | 2.01 |                |
| VC1532                                | ROK family protein                                                                                 | 0.49 |                |
| VC1897                                | Hit family protein                                                                                 | 0.45 |                |

|         |                                            |      |                |
|---------|--------------------------------------------|------|----------------|
| VC2067  | MinD-related protein                       | 0.49 |                |
| VC2361  | formate acetyl transferase-related protein | 0.46 |                |
| VC2450  | mazG protein <i>mazG</i>                   | 2.56 |                |
| VCA0038 | Sco1-related protein                       | 2.08 |                |
| VCA0148 | TagA-related protein                       | 0.36 |                |
| VCA0165 | GGDEF family protein                       | 2.00 |                |
| VCA0175 | MoxR-related protein                       | 3.59 | $\sigma^E$ (+) |
| VCA0659 | protein F-related protein                  | 0.47 | VpsR(+)        |
| VCA0785 | GGDEF family protein                       | 6.41 | VpsR(+)        |
| VCA0969 | pirin-related protein                      | 2.01 |                |

---

### VPS Biosynthesis

---

|        |                                                                |       |         |
|--------|----------------------------------------------------------------|-------|---------|
| VC0916 | phosphotyrosine protein phosphatase                            | 5.15  | VpsR(+) |
| VC0917 | UDP-N-acetylglucosamine 2-epimerase <i>wecB</i>                | 6.52  | VpsR(+) |
| VC0918 | UDP-N-acetyl-D-mannosaminuronic acid dehydrogenase <i>epsD</i> | 10.28 | VpsR(+) |
| VC0919 | serine acetyltransferase-related protein                       | 13.31 | VpsR(+) |
| VC0920 | exopolysaccharide biosynthesis protein EpsF_ putative          | 2.70  | VpsR(+) |
| VC0922 | hypothetical protein                                           | 2.97  | VpsR(+) |
| VC0923 | serine acetyltransferase-related protein                       | 2.17  | VpsR(+) |
| VC0924 | capK protein_ putative                                         | 2.57  | VpsR(+) |
| VC0925 | polysaccharide biosynthesis protein_ putative                  | 2.84  | VpsR(+) |
| VC0926 | hypothetical protein                                           | 4.60  | VpsR(+) |
| VC0927 | UDP-N-acetyl-D-mannosamine transferase <i>cpsF</i>             | 2.07  | VpsR(+) |
| VC0928 | hypothetical protein                                           | 14.26 | VpsR(+) |
| VC0929 | hypothetical protein                                           | 20.81 | VpsR(+) |
| VC0930 | hemolysin-related protein                                      | 17.79 | VpsR(+) |
| VC0932 | hypothetical protein                                           | 8.95  | VpsR(+) |
| VC0933 | hypothetical protein                                           | 36.40 | VpsR(+) |
| VC0935 | hypothetical protein                                           | 9.24  | VpsR(+) |
| VC0936 | polysaccharide export-related protein                          | 6.92  | VpsR(+) |
| VC0937 | exopolysaccharide biosynthesis protein_ putative               | 3.38  | VpsR(+) |
| VC0938 | hypothetical protein                                           | 2.90  | VpsR(+) |

---

### Hypothetical Proteins

---

|        |                                |      |                |
|--------|--------------------------------|------|----------------|
| VC0131 | conserved hypothetical protein | 2.36 |                |
| VC0187 | conserved hypothetical protein | 3.02 |                |
| VC0370 | conserved hypothetical protein | 2.90 |                |
| VC0420 | conserved hypothetical protein | 2.24 |                |
| VC0421 | conserved hypothetical protein | 2.26 |                |
| VC0483 | conserved hypothetical protein | 2.97 | VpsR(+)        |
| VC0490 | conserved hypothetical protein | 2.21 |                |
| VC0603 | conserved hypothetical protein | 2.44 |                |
| VC0694 | conserved hypothetical protein | 0.49 |                |
| VC0702 | conserved hypothetical protein | 2.09 |                |
| VC0761 | conserved hypothetical protein | 2.04 |                |
| VC0872 | conserved hypothetical protein | 2.01 |                |
| VC0873 | conserved hypothetical protein | 4.82 | $\sigma^E$ (-) |
| VC1131 | conserved hypothetical protein | 0.34 |                |
| VC1306 | conserved hypothetical protein | 2.18 | $\sigma^E$ (-) |
| VC1421 | conserved hypothetical protein | 0.48 |                |
| VC1497 | conserved hypothetical protein | 3.10 |                |
| VC1503 | conserved hypothetical protein | 0.47 |                |

|         |                                |       |                |
|---------|--------------------------------|-------|----------------|
| VC1567  | conserved hypothetical protein | 4.16  |                |
| VC1576  | conserved hypothetical protein | 2.68  |                |
| VC1701  | conserved hypothetical protein | 7.04  | VpsR(+)        |
| VC1841  | conserved hypothetical protein | 0.46  |                |
| VC1842  | conserved hypothetical protein | 0.48  |                |
| VC1851  | conserved hypothetical protein | 0.44  |                |
| VC1884  | conserved hypothetical protein | 2.09  |                |
| VC1937  | conserved hypothetical protein | 2.00  | VpsR(+)        |
| VC1957  | conserved hypothetical protein | 2.79  | $\sigma^E$ (+) |
| VC1978  | conserved hypothetical protein | 2.02  |                |
| VC1986  | conserved hypothetical protein | 2.46  |                |
| VC2146  | conserved hypothetical protein | 2.22  |                |
| VC2164  | conserved hypothetical protein | 2.83  |                |
| VC2206  | conserved hypothetical protein | 0.46  |                |
| VC2253  | conserved hypothetical protein | 2.12  |                |
| VC2441  | conserved hypothetical protein | 0.43  |                |
| VC2471  | conserved hypothetical protein | 0.47  |                |
| VC2473  | conserved hypothetical protein | 4.35  |                |
| VC2517  | conserved hypothetical protein | 2.70  | $\sigma^E$ (-) |
| VC2518  | conserved hypothetical protein | 2.78  | $\sigma^E$ (-) |
| VC2548  | conserved hypothetical protein | 2.25  | $\sigma^E$ (-) |
| VC2716  | conserved hypothetical protein | 2.24  |                |
| VCA0094 | conserved hypothetical protein | 2.61  |                |
| VCA0167 | conserved hypothetical protein | 2.06  | VpsR(+)        |
| VCA0171 | conserved hypothetical protein | 2.77  |                |
| VCA0172 | conserved hypothetical protein | 3.31  |                |
| VCA0174 | conserved hypothetical protein | 2.48  | $\sigma^E$ (+) |
| VCA0323 | conserved hypothetical protein | 3.31  |                |
| VCA0536 | conserved hypothetical protein | 0.30  | VpsR(-)        |
| VCA0539 | conserved hypothetical protein | 2.06  |                |
| VCA0546 | conserved hypothetical protein | 0.45  |                |
| VCA0582 | conserved hypothetical protein | 0.42  |                |
| VCA0732 | conserved hypothetical protein | 20.14 | $\sigma^E$ (-) |
| VCA0931 | conserved hypothetical protein | 0.35  |                |
| VCA0948 | conserved hypothetical protein | 2.22  |                |
| VCA1004 | conserved hypothetical protein | 0.49  |                |
| VCA1065 | conserved hypothetical protein | 0.45  |                |
| VCA1085 | conserved hypothetical protein | 0.31  | VpsR(-)        |
| VCA0887 | conserved hypothetical protein | 2.97  | VpsR(+)        |
| VC1307  | conserved hypothetical protein | 2.73  |                |
| VC0104  | hypothetical protein           | 2.00  |                |
| VC0132  | hypothetical protein           | 3.56  |                |
| VC0189  | hypothetical protein           | 2.32  |                |
| VC0301  | hypothetical protein           | 2.17  |                |
| VC0314  | hypothetical protein           | 2.03  |                |
| VC0713  | hypothetical protein           | 2.67  |                |
| VC0860  | hypothetical protein           | 2.41  |                |
| VC0862  | hypothetical protein           | 0.43  |                |
| VC0955  | hypothetical protein           | 0.50  |                |
| VC1007  | hypothetical protein           | 0.27  |                |

|         |                      |       |                         |
|---------|----------------------|-------|-------------------------|
| VC1080  | hypothetical protein | 0.12  | VpsR(+)                 |
| VC1116  | hypothetical protein | 3.81  |                         |
| VC1158  | hypothetical protein | 2.16  |                         |
| VC1160  | hypothetical protein | 2.62  |                         |
| VC1162  | hypothetical protein | 3.58  |                         |
| VC1192  | hypothetical protein | 0.46  |                         |
| VC1224  | hypothetical protein | 2.64  |                         |
| VC1262  | hypothetical protein | 0.07  |                         |
| VC1384  | hypothetical protein | 0.39  |                         |
| VC1418  | hypothetical protein | 4.21  |                         |
| VC1419  | hypothetical protein | 2.69  |                         |
| VC1420  | hypothetical protein | 2.19  |                         |
| VC1423  | hypothetical protein | 2.33  |                         |
| VC1438  | hypothetical protein | 0.46  |                         |
| VC1505  | hypothetical protein | 2.17  |                         |
| VC1564  | hypothetical protein | 3.82  | $\sigma^E$ (+)          |
| VC1572  | hypothetical protein | 2.71  |                         |
| VC1613  | hypothetical protein | 0.41  |                         |
| VC1637  | hypothetical protein | 7.21  | $\sigma^E$ (-)          |
| VC1699  | hypothetical protein | 0.31  |                         |
| VC1729  | hypothetical protein | 0.50  |                         |
| VC1742  | hypothetical protein | 4.84  | $\sigma^E$ (+)          |
| VC1743  | hypothetical protein | 7.40  | $\sigma^E$ (+)          |
| VC1943  | hypothetical protein | 0.49  |                         |
| VC1946  | hypothetical protein | 6.46  |                         |
| VC2005  | hypothetical protein | 0.11  |                         |
| VC2046  | hypothetical protein | 0.32  | $\sigma^E$ (+)          |
| VC2058  | hypothetical protein | 0.48  |                         |
| VC2189  | hypothetical protein | 0.15  |                         |
| VC2205  | hypothetical protein | 0.48  |                         |
| VC2207  | hypothetical protein | 0.18  |                         |
| VC2208  | hypothetical protein | 0.44  |                         |
| VC2212  | hypothetical protein | 2.04  | $\sigma^E$ (-)          |
| VC2221  | hypothetical protein | 0.32  |                         |
| VC2611  | hypothetical protein | 0.46  |                         |
| VC2667  | hypothetical protein | 3.25  | VpsR(+)                 |
| VC2717  | hypothetical protein | 0.21  |                         |
| VCA0003 | hypothetical protein | 2.10  |                         |
| VCA0081 | hypothetical protein | 2.60  |                         |
| VCA0095 | hypothetical protein | 8.10  |                         |
| VCA0096 | hypothetical protein | 6.58  |                         |
| VCA0122 | hypothetical protein | 2.12  |                         |
| VCA0125 | hypothetical protein | 3.45  |                         |
| VCA0139 | hypothetical protein | 36.96 | $\sigma^E$ (-), VpsR(+) |
| VCA0162 | hypothetical protein | 0.38  |                         |
| VCA0168 | hypothetical protein | 3.52  |                         |
| VCA0169 | hypothetical protein | 2.04  |                         |
| VCA0170 | hypothetical protein | 2.44  |                         |
| VCA0195 | hypothetical protein | 0.43  | VpsR(+)                 |
| VCA0224 | hypothetical protein | 3.29  |                         |

|         |                      |       |                         |
|---------|----------------------|-------|-------------------------|
| VCA0236 | hypothetical protein | 0.50  | VpsR(-)                 |
| VCA0258 | hypothetical protein | 3.95  | VpsR(+)                 |
| VCA0403 | hypothetical protein | 2.02  |                         |
| VCA0434 | hypothetical protein | 0.41  | $\sigma^E$ (+)          |
| VCA0551 | hypothetical protein | 3.43  | $\sigma^E$ (+)          |
| VCA0567 | hypothetical protein | 2.20  |                         |
| VCA0701 | hypothetical protein | 4.18  |                         |
| VCA0721 | hypothetical protein | 3.19  | $\sigma^E$ (-), VpsR(+) |
| VCA0722 | hypothetical protein | 2.37  | $\sigma^E$ (-)          |
| VCA0733 | hypothetical protein | 2.19  | $\sigma^E$ (-)          |
| VCA0787 | hypothetical protein | 0.29  |                         |
| VCA0845 | hypothetical protein | 4.96  | $\sigma^E$ (-), VpsR(+) |
| VCA0849 | hypothetical protein | 9.91  | VpsR(+)                 |
| VCA0868 | hypothetical protein | 0.22  |                         |
| VCA0882 | hypothetical protein | 2.55  |                         |
| VCA0899 | hypothetical protein | 0.39  |                         |
| VCA0916 | hypothetical protein | 2.69  |                         |
| VCA0918 | hypothetical protein | 4.22  |                         |
| VCA0962 | hypothetical protein | 10.70 | $\sigma^E$ (-)          |
| VCA0966 | hypothetical protein | 3.29  | $\sigma^E$ (+), VpsR(+) |
| VCA0967 | hypothetical protein | 3.19  | $\sigma^E$ (+)          |
| VCA0971 | hypothetical protein | 0.32  |                         |
| VCA0976 | hypothetical protein | 2.79  | VpsR(-)                 |
| VCA0997 | hypothetical protein | 0.35  |                         |
| VCA1032 | hypothetical protein | 2.54  |                         |
| VCA1075 | hypothetical protein | 0.36  | VpsR(-)                 |
| VCA1076 | hypothetical protein | 0.23  |                         |
| VCA1103 | hypothetical protein | 0.37  |                         |
| VCA0494 | hypothetical protein | 0.22  |                         |

---

**Others**

|         |                                                                                    |       |                |
|---------|------------------------------------------------------------------------------------|-------|----------------|
| VC0737  | acetoin utilization protein AcuB_ putative                                         | 0.47  |                |
| VC1161  | gonadoliberin III-related protein                                                  | 2.32  | $\sigma^E$ (-) |
| VC1696  | DNA-binding protein inhibitor Id-2-related protein                                 | 0.34  |                |
| VC1888  | hemolysin-related protein                                                          | 45.28 | VpsR(+)        |
| VC1935  | CDP-diacylglycerol--glycerol-3-phosphate 3-phosphatidyltransferase-related protein | 2.33  |                |
| VCA0907 | heme-binding protein HutZ <i>hutZ</i>                                              | 3.49  |                |
| VCA0908 | hutX protein <i>hutX</i>                                                           | 2.92  | VpsR(-)        |
